# Supplementary material
Source: publisher site journal article supplement (https://www.spandidos-publications.com/4441/downloadSupplementary)
Supplement: Supplementary file 1 [file downloadSupplementary]

## Sheet: Sheet1
Table SVII. 33 of the 505 chromosome 3p genes belonged to the over-lapping genes of differential expression
UP	DN
C3orf14	FGD5
FANCD2	RBMS3
CADPS	FYCO1
CDC25A	CLEC3B
GRM2	VGLL3
	VIPR1
	CISH
	ALS2CL
	PRKCD
	PPARG
	FRMD4B
	PRICKLE2
	RFTN1
	GNAI2
	CACNA2D2
	SH3BP5
	PLCD1
	ARHGEF3
	GPD1L
	ATXN7
	CCRL2
	FAM107A
	ADAMTS9
	CMTM8
	PPM1M
	PTPRG
	CCR1
	GPX1
